# Supplementary material for: Essential Oil Composition of Ruta graveolens L. Fruits and Hyssopus officinalis Subsp. aristatus (Godr.) Nyman Biomass as a Function of Hydrodistillation Time
Source: PubMed Central journal article supplement (PMC6891472; doi:10.3390/molecules24224047), 2019-11-08
Supplement: molecules-24-04047-s001.pdf [file molecules-24-04047-s001.pdf]

**Supplemental Table 1**Concentration range, percentage of volatile components in *Ruta graveolens* fruits from Bulgaria.

| Peak # | RI   | Compound name                   | min    | max    |
|--------|------|---------------------------------|--------|--------|
| 1      | 846  | (2E)-2-Hexenal                  | 0.162  | 2.532  |
| 2      | 901  | n-Heptanal                      | 0.135  | 1.350  |
| 3      | 952  | Benzaldehyde                    | 0.107  | 7.490  |
| 4      | 991  | $\beta$ -Myrcene                | nd     | 0.168  |
| 5      | 1022 | o-Cymene                        | 0.145  | 0.313  |
| 6      | 1024 | D-Limonene                      | 0.166  | 1.214  |
| 7      | 1026 | Eucalyptol                      | 0.283  | 19.303 |
| 8      | 1087 | 2-Nonanone                      | 12.206 | 60.380 |
| 9      | 1096 | 2-Nonanol                       | 0.656  | 4.662  |
| 10     | 1100 | Nonanal                         | 0.141  | 2.605  |
| 11     | 1135 | trans-Pinocarveol               | nd     | 3.609  |
| 12     | 1140 | Nopinone                        | nd     | 3.821  |
| 13     | 1143 | Geijerene                       | nd     | 0.903  |
| 14     | 1162 | trans-Pinocamphone              | nd     | 8.182  |
| 15     | 1165 | n-Nonanol                       | nd     | 2.833  |
| 16     | 1174 | Terpinen-4-ol                   | 0.607  | 5.436  |
| 17     | 1185 | 3-Decanone                      | nd     | 1.305  |
| 18     | 1187 | $\alpha$ -Terpineol             | 0.555  | 8.454  |
| 19     | 1191 | 2-Decanone                      | nd     | 4.113  |
| 20     | 1294 | 2-Undecanone                    | nd     | 35.493 |
| 21     | 1301 | 2-Undecanol                     | nd     | 5.330  |
| 22     | 1388 | 2-Dodecanone                    | nd     | 2.405  |
| 23     | 1417 | $\beta$ -Caryophyllene          | 0.809  | 6.896  |
| 24     | 1394 | Ethyl decanoate                 | nd     | 3.053  |
| 25     | 1424 | Methyl undecanoate              | 0.218  | 2.183  |
| 26     | 1456 | $\alpha$ -Caryophyllene         | 0.221  | 4.963  |
| 27     | 1496 | 2-Tridecanone                   | nd     | 2.034  |
| 28     | 1500 | $\alpha$ -Muurolene             | 0.168  | 1.721  |
| 29     | 1524 | $\delta$ -Cadinene              | 0.793  | 3.805  |
| 30     | 1549 | Elemol                          | nd     | 0.890  |
| 31     | 1570 | Tridecanol                      | nd     | 2.423  |
| 32     | 1582 | Caryophyllene oxide             | 0.343  | 6.022  |
| 33     | 1619 | tau.-Cadinol                    | nd     | 1.029  |
| 34     | 1638 | tau.-Muurolol                   | nd     | 2.057  |
| 35     | 1650 | $\beta$ -Eudesmol               | nd     | 3.305  |
| 36     | 1756 | $\alpha$ -amyl-Cinnamyl acetate | nd     | 1.274  |

|    |      |                          |       |       |
|----|------|--------------------------|-------|-------|
| 37 | 1828 | Isopropyl tetradecanoate | nd    | 0.579 |
| 38 | 1992 | Manoyl oxide             | 0.395 | 6.691 |
| 39 | 2100 | n-Heneicosane            | nd    | 0.219 |
| 40 | 2200 | n-Docosane               | nd    | 0.296 |
| 41 | 2300 | n-Tricosane              | nd    | 0.412 |
| 42 | 2400 | n-Tetracosane            | nd    | 0.371 |
| 43 | 2500 | n-Pentacosane            | nd    | 0.449 |

nd – not detected

### Supplemental Table 2

Concentration range, percentage of volatile components in *Hyssopus officinalis* subsp. *aristatus* aboveground biomass from Bulgaria.

| Peak # | RT    | RI   | Compound name                     | min    | max    |
|--------|-------|------|-----------------------------------|--------|--------|
| 1      | 10.15 | 933  | $\alpha$ -Pinene                  | nd     | 6.804  |
| 2      | 10.63 | 946  | Camphene                          | nd     | 0.220  |
| 3      | 11.39 | 969  | Sabinene                          | nd     | 9.384  |
| 4      | 11.61 | 974  | $\beta$ -Pinene                   | nd     | 15.875 |
| 5      | 12.02 | 991  | $\beta$ -Myrcene                  | nd     | 1.736  |
| 6      | 13.16 | 1025 | p-Cymene                          | nd     | 0.923  |
| 7      | 13.20 | 1026 | Eucalyptol                        | 25.036 | 58.752 |
| 8      | 13.73 | 1032 | (Z)- $\beta$ -Ocimene             | nd     | 0.532  |
| 9      | 14.12 | 1043 | (E)- $\beta$ -Ocimene             | nd     | 0.909  |
| 10     | 14.24 | 1054 | $\gamma$ -Terpinene               | nd     | 0.617  |
| 11     | 15.11 | 1087 | $\alpha$ -Terpinolene             | nd     | 2.377  |
| 12     | 15.55 | 1096 | $\beta$ -Linalool                 | 0.331  | 2.233  |
| 13     | 16.84 | 1135 | trans-Pinocarveol                 | 1.240  | 3.729  |
| 14     | 16.97 | 1138 | cis-Verbenol                      | 0.287  | 3.529  |
| 15     | 17.48 | 1160 | Pinocarvone                       | 1.216  | 3.343  |
| 16     | 17.88 | 1172 | cis-3-Pinanone (cis-Pinocamphone) | 8.372  | 20.288 |
| 17     | 17.97 | 1174 | Terpinen-4-ol                     | 0.910  | 2.169  |
| 18     | 18.20 | 1183 | Cryptone                          | 0.419  | 2.374  |
| 19     | 18.47 | 1187 | $\alpha$ -Terpineol               | 1.909  | 5.433  |
| 20     | 18.88 | 1195 | Myrtenal                          | nd     | 1.402  |
| 21     | 19.17 | 1204 | Verbenone                         | 0.155  | 3.089  |
| 22     | 19.85 | 1215 | trans-Carveol                     | 0.411  | 2.443  |
| 23     | 19.98 | 1224 | cis-Carveol                       | 0.110  | 1.646  |
| 24     | 21.26 | 1289 | p-Cymen-7-ol (Cuminol)            | nd     | 0.330  |
| 25     | 21.36 | 1295 | Perilla alcohol                   | nd     | 0.307  |
| 26     | 22.10 | 1324 | Myrtenyl acetate                  | nd     | 0.463  |

|    |       |      |                         |       |       |
|----|-------|------|-------------------------|-------|-------|
| 27 | 23.55 | 1374 | $\alpha$ -Copaene       | nd    | 0.714 |
| 28 | 23.77 | 1385 | $\beta$ -Bourbonene     | 0.469 | 1.620 |
| 29 | 23.84 | 1388 | $\beta$ -Cubebene       | nd    | 0.326 |
| 30 | 24.71 | 1417 | $\beta$ -Caryophyllene  | nd    | 0.518 |
| 31 | 25.62 | 1456 | $\alpha$ -Caryophyllene | nd    | 0.240 |
| 32 | 26.66 | 1499 | $\alpha$ -Muurolene     | nd    | 2.518 |
| 33 | 26.70 | 1501 | Bicyclogermacrene       | nd    | 2.332 |
| 34 | 27.03 | 1513 | $\gamma$ -Cadinene      | nd    | 0.216 |
| 35 | 27.14 | 1524 | $\delta$ -Cadinene      | nd    | 0.213 |
| 36 | 28.51 | 1577 | (-)-Spathulenol         | 0.297 | 3.178 |
| 37 | 28.69 | 1582 | Caryophyllene oxide     | nd    | 1.601 |
| 38 | 30.05 | 1619 | tau.-Cadinol            | nd    | 0.241 |
| 39 | 30.36 | 1638 | tau.-Muurolol           | nd    | 0.348 |
| 40 | 37.44 | 1992 | Manoyl oxide            | nd    | 0.602 |
| 41 | 39.31 | 2100 | n-Heneicosane           | nd    | 0.151 |
| 42 | 41.13 | 2200 | n-Docosane              | nd    | 0.161 |
| 43 | 42.85 | 2300 | n-Tricosane             | nd    | 0.194 |
| 44 | 44.49 | 2400 | n-Tetracosane           | nd    | 0.145 |
| 45 | 46.08 | 2500 | n-Pentacosane           | nd    | 0.217 |

nd – not detected
